# Supplementary material for: Abundant heterointerfaces in CoS2/MoS2 nanosheet array electrocatalysts for the enhanced oxygen evolution reaction
Source: Royal Society of Chemistry journal article supplement (doi:10.1039/d4nj00357h), 2024-01-01
Supplement: d4nj00357h1.pdf [file d4nj00357h1.pdf]

## Supporting Information

# Abundant heterointerfaces in CoS<sub>2</sub>/MoS<sub>2</sub> nanosheet array electrocatalysts for enhanced oxygen evolution reaction

Zhaojin Li<sup>†</sup>, Qian Ma<sup>†</sup>, Shaofei Zhang<sup>†</sup>, Di Zhang<sup>†</sup>, Huan Wang<sup>†</sup>, Qiujuan Wang<sup>†</sup>, Huilan Sun<sup>†</sup>, Bo Wang<sup>†\*</sup>

<sup>†</sup> Hebei Key Laboratory of Flexible Functional Materials, School of Materials Science and Engineering, Hebei University of Science and Technology, Hebei 050018 (China)

\* Author to whom correspondence should be addressed: School of Materials Science and Engineering, Hebei University of Science and Technology, Hebei 050018 (China)

E-mail addresses: [wangbo1996@gmail.com](mailto:wangbo1996@gmail.com)

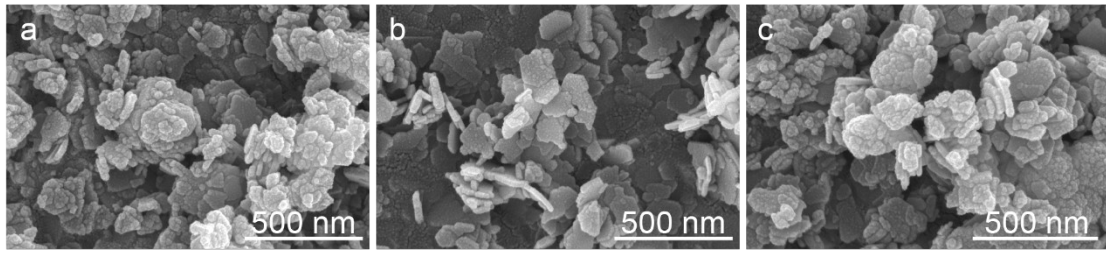

**Fig. S1** SEM images of CoS<sub>2</sub>/MoS<sub>2</sub> with different Co/Mo ratios: (a) CoS<sub>2</sub>/MoS<sub>2</sub>-1:2; (b) CoS<sub>2</sub>/MoS<sub>2</sub>-1:1; (c) CoS<sub>2</sub>/MoS<sub>2</sub>-2:1

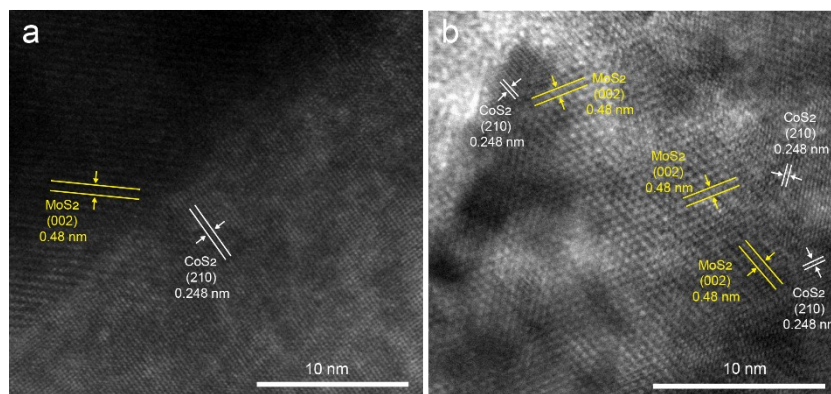

**Fig. S2** HRTEM images of the CoS<sub>2</sub>/MoS<sub>2</sub>-1:1 nanosheets

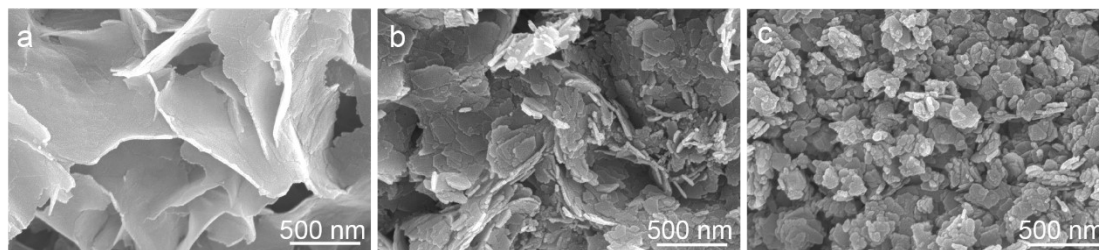

**Fig. S3** SEM images of CoS<sub>2</sub>/MoS<sub>2</sub>-1:1 obtained at different hydrothermal time: (a) 2 h; (b) 4 h; (c) 6 h

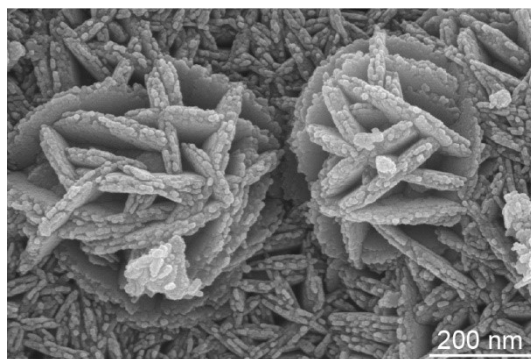

**Fig. S4** SEM image of Co/Mo oxide with Co/Mo ratio of 1:1

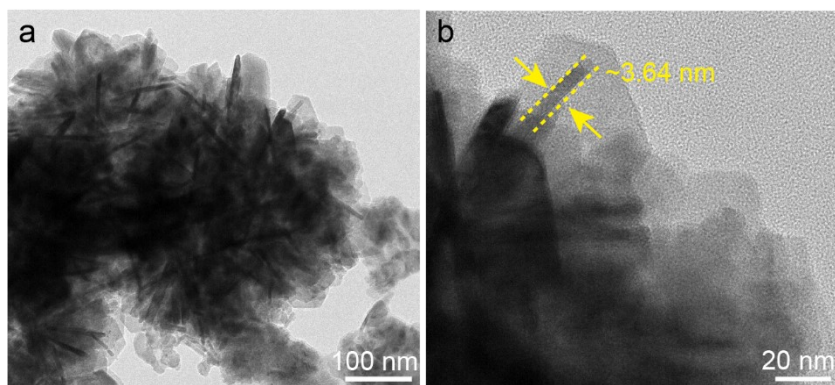

**Fig. S5** TEM images of Co/Mo oxide with Co/Mo ratio of 1:1

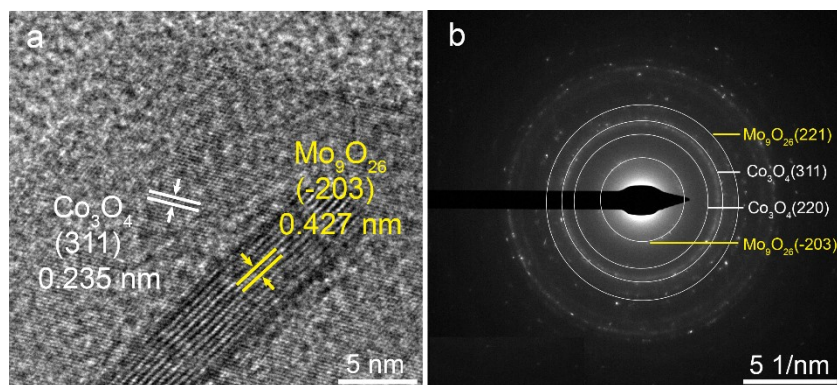

**Fig. S6** HRTEM and SAED images of Co/Mo oxide with Co/Mo ratio of 1:1

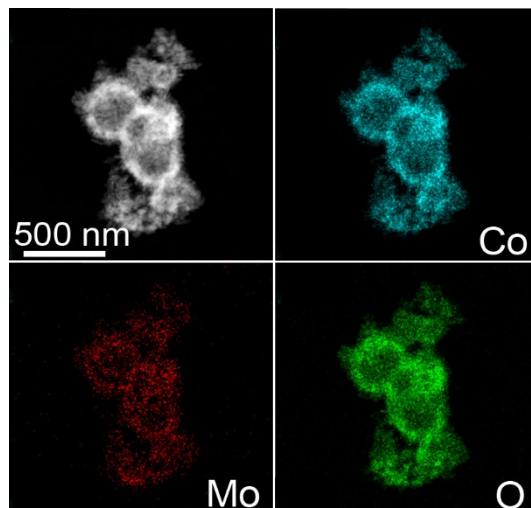

**Fig. S7** Elemental mappings of Co/Mo oxide with Co/Mo ratio of 1:1



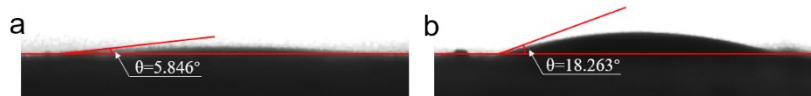

**Fig. S8** Contact angle testing: (a)  $\text{CoS}_2/\text{MoS}_2$ -1:1; (b) Co/Mo oxide

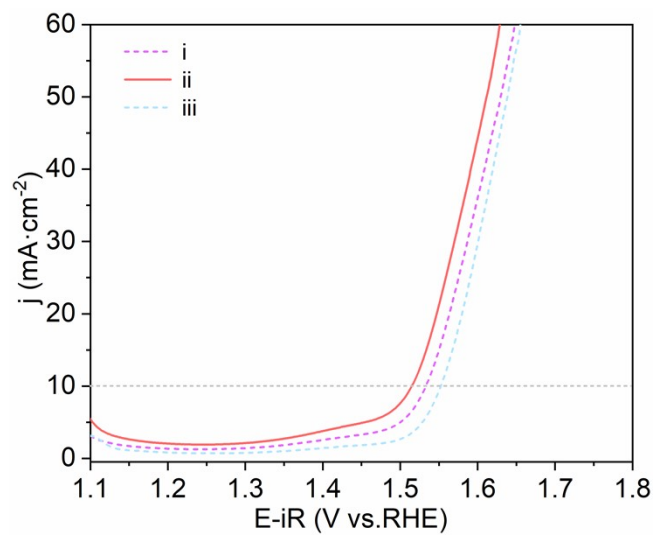

**Fig. S9** LSV curves of CoS<sub>2</sub>/MoS<sub>2</sub>-1:1 with different loads

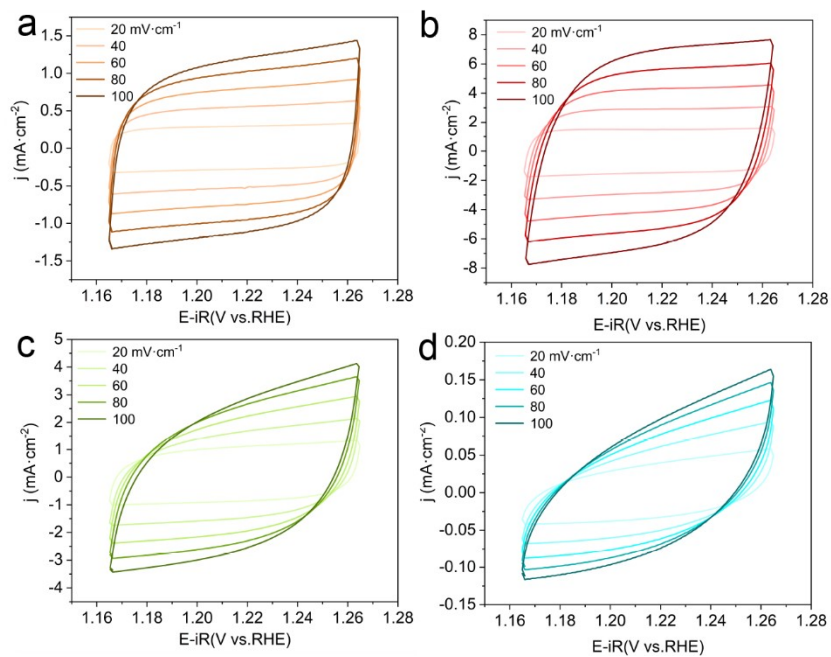

**Fig. S10** CVs at different scan rates of in a potential window where no Faradaic processes occur (1.16-1.26 V vs. RHE) for: (a) CoS<sub>2</sub>/MoS<sub>2</sub>-1:2, (b) CoS<sub>2</sub>/MoS<sub>2</sub>-1:1, (c) CoS<sub>2</sub>/MoS<sub>2</sub>-2:1, (d) Co/Mo oxide

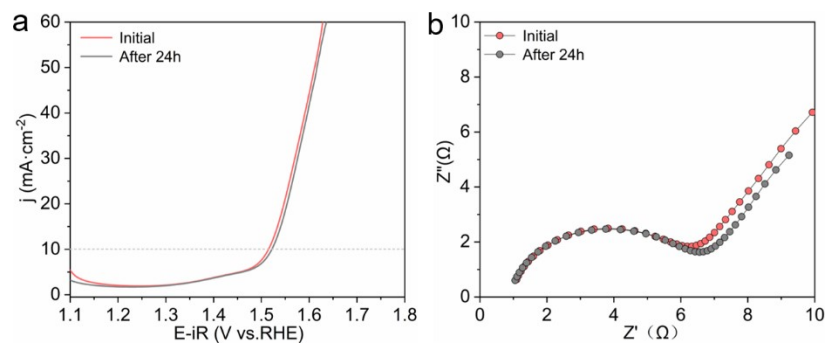

**Fig. S11** (a) LSV curves, (b) Nyquist plots of CoS<sub>2</sub>/MoS<sub>2</sub>-1:1 before and after stability test

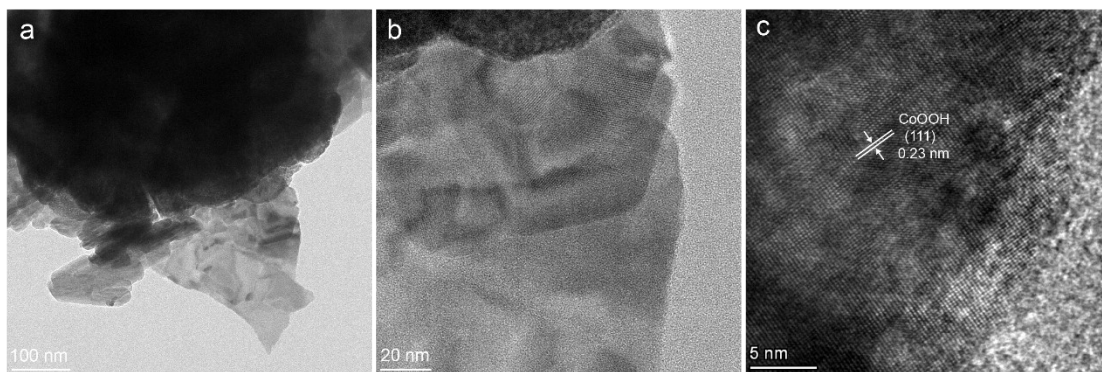

**Fig. S12** TEM images of the  $\text{CoS}_2/\text{MoS}_2$ -1:1 sample after reaction

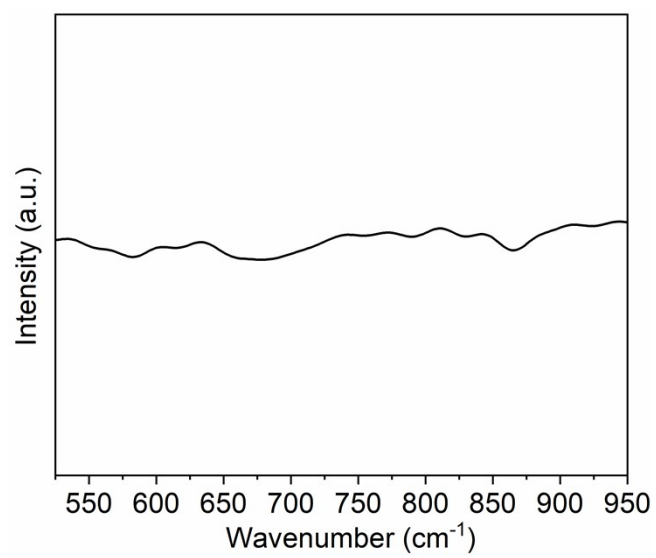

**Fig. S13** FTIR spectra of CoS<sub>2</sub>/MoS<sub>2</sub>-1:1 after reaction

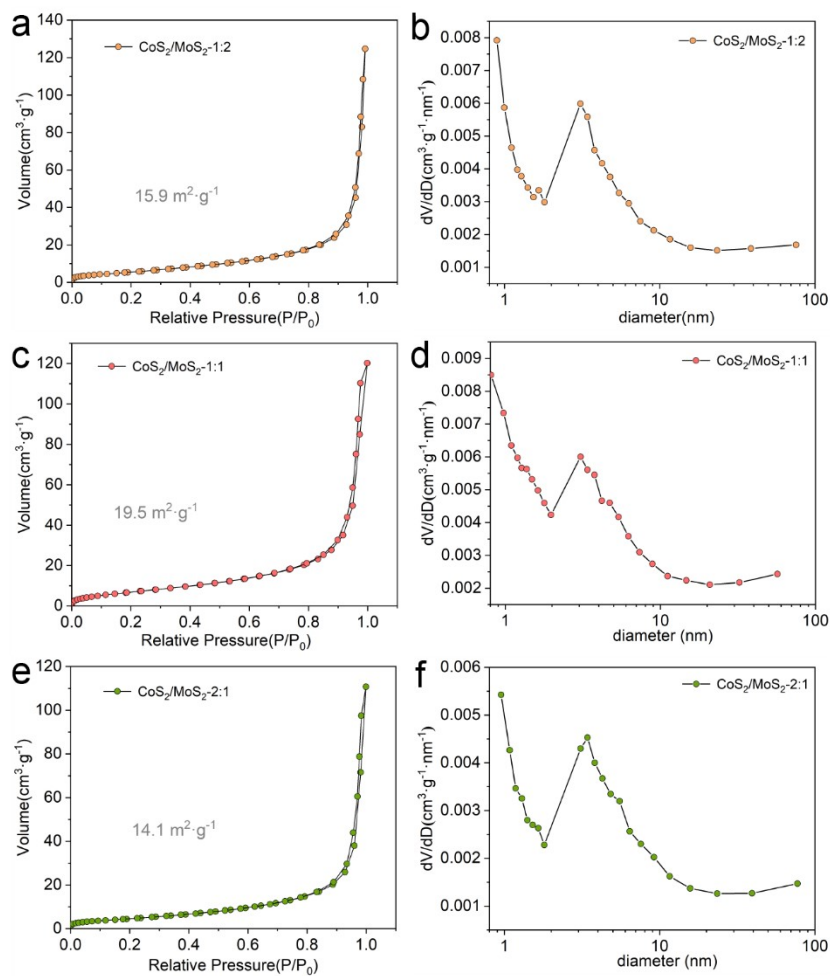

**Fig. S14** (a) Nitrogen adsorption-desorption isotherm and (b) pore distribution curves of CoS<sub>2</sub>/MoS<sub>2</sub>-1:2; (c) Nitrogen adsorption-desorption isotherm and (d) pore distribution curves of CoS<sub>2</sub>/MoS<sub>2</sub>-1:1; (e) Nitrogen adsorption-desorption isotherm and (f) pore distribution curves of CoS<sub>2</sub>/MoS<sub>2</sub>-2:1

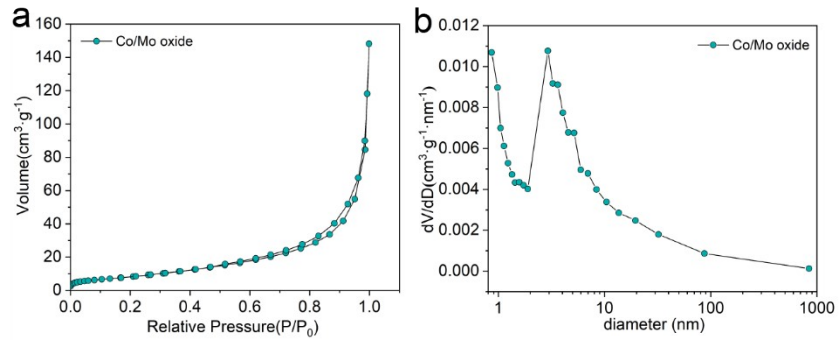

**Fig. S15** (a) Nitrogen adsorption-desorption isotherm and (b) pore distribution curves of Co/Mo oxide with Co/Mo ratio of 1:1



**Table S1** Mass activity of different samples under certain voltage

| Sample                                  | Mass activity(A·g <sup>-1</sup> ) |
|-----------------------------------------|-----------------------------------|
| Co/Mo oxide                             | 4.09                              |
| CoS <sub>2</sub> /MoS <sub>2</sub> -1:2 | 14.49                             |
| CoS <sub>2</sub> /MoS <sub>2</sub> -1:1 | 31.50                             |
| CoS <sub>2</sub> /MoS <sub>2</sub> -2:1 | 22.16                             |

**Table S2** Comparison of Tafel slope and overpotential ( $10 \text{ mA} \cdot \text{cm}^{-2}$ ) with the electrocatalysts in literature

| Materials                                                  | Electrolyte | Overpotential<br>/mV | Tafel slope<br>/mV $\cdot$ dec $^{-1}$ | Ref.      |
|------------------------------------------------------------|-------------|----------------------|----------------------------------------|-----------|
| MoS <sub>2</sub> /NiS                                      | 1.0 M KOH   | 350                  | 108                                    | [S1]      |
| CoS <sub>2</sub> /MoS <sub>2</sub>                         | 1.0 M KOH   | 332                  | 125                                    | [S2]      |
| CoS <sub>2</sub> -5                                        | 1.0 M KOH   | 290                  | 65.6                                   | [S3]      |
| CoS <sub>2</sub> @MoS <sub>2</sub>                         | 1.0 M KOH   | 332                  | 37.5                                   | [S4]      |
| CoS <sub>2</sub> -MoS <sub>2</sub> MSHSs                   | 1.0 M KOH   | 288                  | 62.1                                   | [S5]      |
| CoS NF/CC                                                  | 1.0 M KOH   | 310                  | 73.4                                   | [S6]      |
| Fe-CoS <sub>2</sub> /CC                                    | 1.0 M KOH   | 304                  | 128                                    | [S7]      |
| MoS <sub>2</sub> /CC                                       | 1.0 M KOH   | 503                  | 131                                    | [S8]      |
| meso-Fe-MoS <sub>2</sub> /CoMo <sub>2</sub> S <sub>4</sub> | 1.0 M KOH   | 290                  | 65                                     | [S9]      |
| P-CoS                                                      | 1.0 M KOH   | 340                  | 73                                     | [S10]     |
| CoS <sub>2</sub> /MoS <sub>2</sub>                         | 1.0 M KOH   | 285                  | 105.32                                 | This work |

## References:

- 1 Q. Qin, L. Chen, T. Wei and X. Liu, *Small*, 2019, **15**, 1–13.
- 2 P. Borthakur, P. K. Boruah, M. R. Das, M. M. Ibrahim, T. Altalhi, H. S. El-sheshtawy, S. Szunerits, R. Boukherroub, M. A. Amin, *ACS Appl. Energy Mater.*, 2021, **4**, 1269-1285.
- 3 Y. Zhang, G. Zheng, A. Li, X. Zhu, J. Jiang, Q. Zhang, L. Deng, X. Gao and F. Ouyang, *Inorg. Chem.*, 2022, **61**, 7568-7578.
- 4 X. Liu, Z. Yin, M. Cui, L. Gao, A. Liu, W. N. Su, S. Chen, T. Ma and Y. Li, *J. Colloid Interface Sci.*, 2022, **610**, 653–662.
- 5 V. Ganesan and J. Kim, *Int. J. Hydrogen Energy*, 2020, **45**, 13290–13299.
- 6 Y. Li, X. Fu, W. Zhu, J. Gong, J. Sun, D. Zhang and J. Wang, *Inorg. Chem. Front.*, 2019, **6**, 2090–2095.
- 7 W. Kong, X. Luan, H. Du, L. Xia and F. Qu, *Chem. Commun.*, 2019, **55**, 2469–2472.
- 8 Q. Sun, Y. Tong, P. Chen, B. Zhou and X. Dong, *ACS Sustain. Chem. Eng.*, 2021, **9**, 4206–4212.
- 9 Y. Guo, J. Tang, J. Henzie, B. Jiang, W. Xia, T. Chen, Y. Bando, Y. M. Kang, M. S. A. Hossain, Y. Sugahara and Y. Yamauchi, *ACS Nano*, 2020, **14**, 4141–4152.
- 10 J. Jiang, J. Xu, W. Wang, L. Zhang and G. Xu, *Chem. - A Eur. J.*, 2020, **26**, 14903–14911.
